# Supplementary material for: Lack of consideration of sex and gender in COVID-19 clinical studies
Source: PubMed Central journal article supplement (PMC8260641; doi:10.1038/s41467-021-24265-8), 2021-07-06
Supplement: 41467_2021_24265_MOESM1_ESM.pdf [file 41467_2021_24265_MOESM1_ESM.pdf]

# Supplementary Information for Lack of Consideration of Sex and Gender in COVID-19 Clinical Studies

Emer Brady<sup>1</sup>, Mathias Wullum Nielsen<sup>2</sup>, Jens Peter Andersen<sup>1</sup>, Sabine Oertelt-Prigione<sup>3,4</sup>

<sup>1</sup>Danish Centre for Studies on Research and Research Policy, Aarhus University, Aarhus, Denmark

<sup>2</sup>Department of Sociology, University of Copenhagen, Copenhagen, Denmark

<sup>3</sup>Department of Primary and Community Care, Radboud University Medical Center, Nijmegen, Netherlands

<sup>4</sup>Medical Faculty OWL, University of Bielefeld, Bielefeld, Germany

## Contents

### Supplementary Figures

|                                                                                                                          |   |
|--------------------------------------------------------------------------------------------------------------------------|---|
| <b>Supplementary Figure 1:</b> Level of attention to sex/gender per month.....                                           | 2 |
| <b>Supplementary Figure 2:</b> Number of studies taking place in the top-20 countries hosting recruiting facilities..... | 3 |

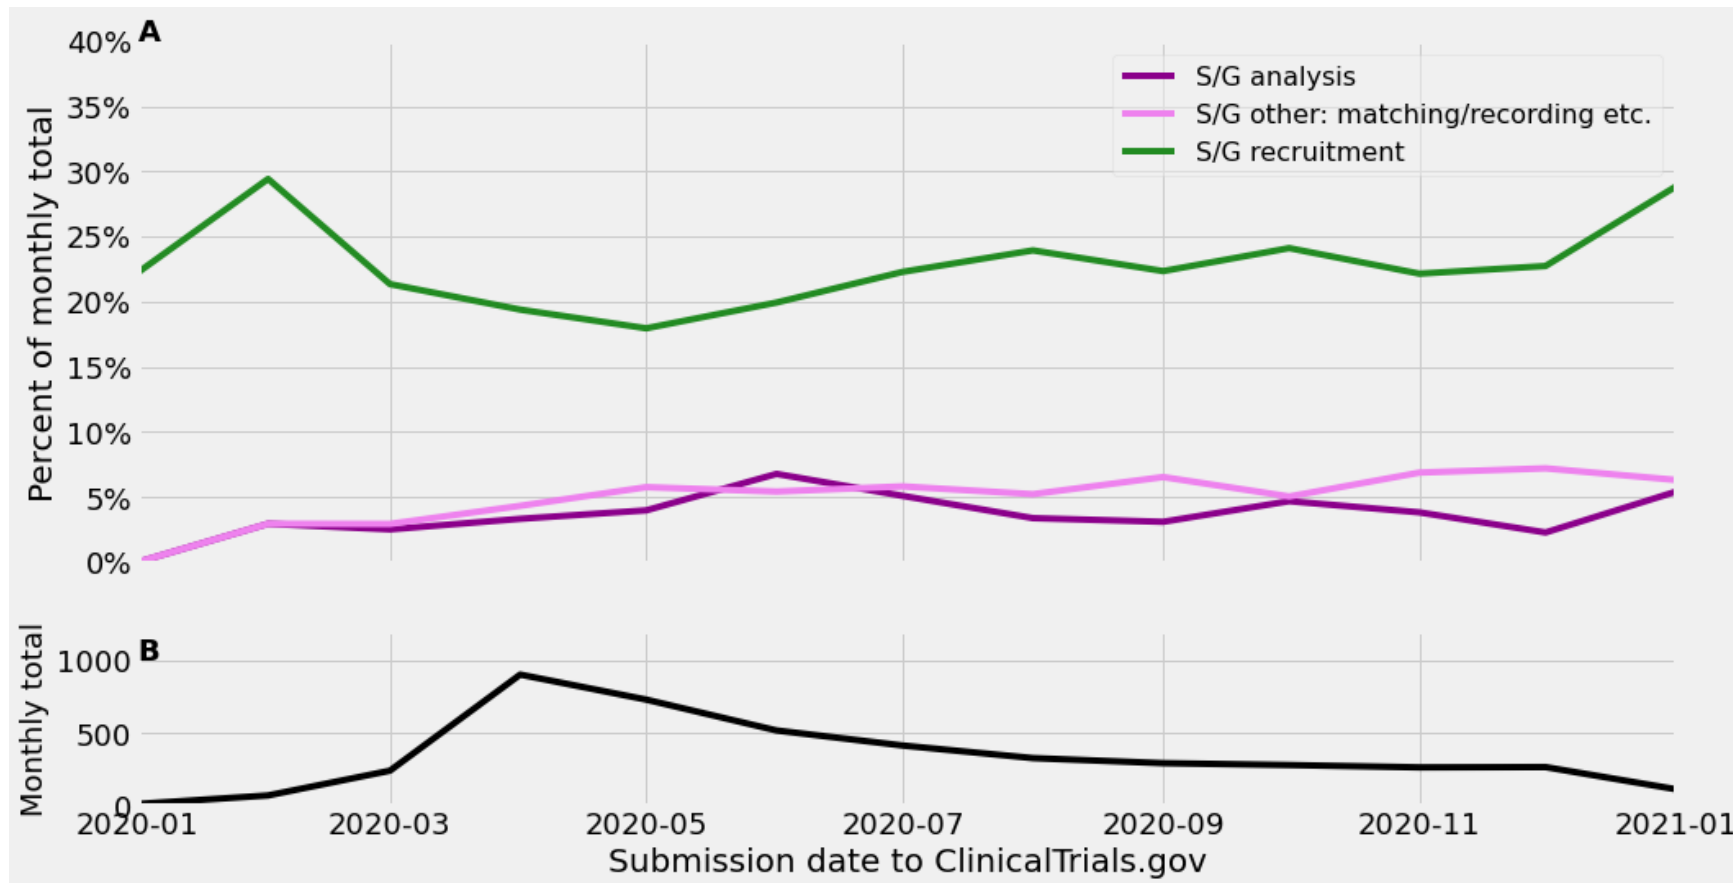

**Supplementary Figure 1. Level of attention to sex/gender per month.** Panel A: For all studies first submitted to ClinicalTrials.gov in a given month, we show the fraction that fall into the three main sex/gender categories we coded for (not shown are single sex and no sex/gender studies). Note that study registrations can be updated at any time after submission and that we coded the studies into sex/gender categories using the information available in the registrations on ClinicalTrials.gov in January 2021. Panel B shows the monthly counts of studies submitted to ClinicalTrials.gov for our full set of 4420. We used the ‘study first submitted date’ on the shared x-axis, since all studies have one and it is generally required that they are registered before they start, though this is not always adhered to.

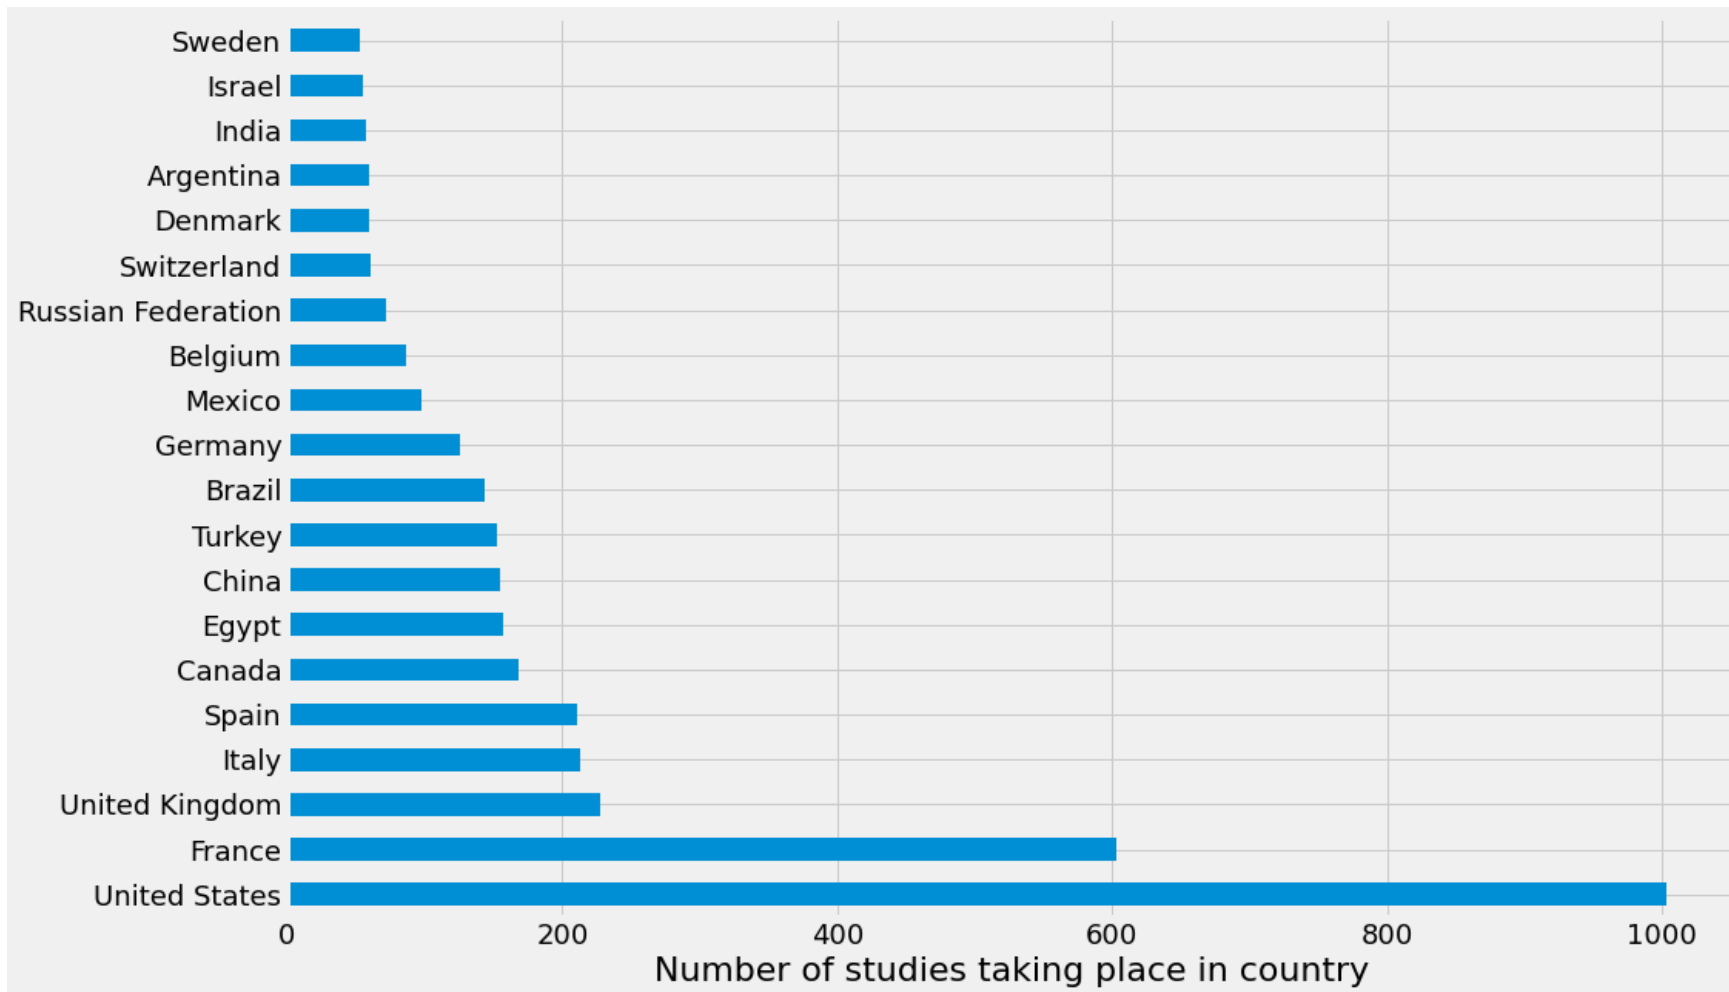

**Supplementary Figure 2. Number of studies taking place in the top-20 countries hosting recruiting facilities.** A study is counted once under each country that hosts one or more of its recruiting facilities. 3920 studies provided addresses with country information for their participating facilities.
